# Back to the future: Implications of genetic complexity for hybrid breeding strategies

Frank Technow\*, Dean Podlich<sup>†</sup> and Mark Cooper<sup>‡</sup>

**Abstract** Commercial hybrid breeding operations can be described as decentralized networks of smaller, more or less isolated breeding programs. There is further a tendency for the disproportionate use of successful inbred lines for generating the next generation of recombinants, which has led to a series of significant bottlenecks, particularly in the history of the North American and European maize germplasm. Both the decentralization and the disproportionate inbred use reduce effective population size and constrain the accessible genetic space. Under these conditions, long term response to selection is not expected to be optimal under the classical infinitesimal model of quantitative genetics. In this study we therefore aim to propose an alternative rational for the success of large breeding operations in the context of genetic complexity arising from the structure and properties of interactive genetic networks. For this we use simulations based on the *NK* model of genetic architecture. We indeed found that constraining genetic space and reducing effective population size, through program decentralization and disproportionate inbred use, is required to expose additive genetic variation and thus facilitate heritable genetic gains. These results introduce new insights into why the historically grown structure of hybrid breeding programs was successful in improving the yield potential of hybrid crops over the last century. We also hope that a renewed appreciation for “why things worked” in the past can guide the adoption of novel technologies and the design of future breeding strategies for navigating biological complexity.

## 1 Introduction

2 Pioneered by Shull (1908), hybrid breeding is cred-  
3 ited as one of the most significant factors for the  
4 tremendous productivity increases of major field  
5 (Duvick, 1999) and horticultural (Silva Dias, 2010)  
6 crops that enabled food production to keep pace  
7 with population growth. Hybrid breeding programs  
8 originally were centred around maximum exploita-  
9 tion of heterosis, a phenomenon that remains largely  
10 unexplained even after a century of research (East,  
11 1936; Lippman and Zamir, 2007). This later evolved  
12 into the modern concept of hybrid breeding, char-  
13 acterized by its distinctive structuring of germplasm  
14 into heterotic groups and patterns (Melchinger and  
15 Gumber, 1998). Beyond heterotic groups, the struc-  
16 ture of commercial hybrid breeding, particularly  
17 in major crops like maize, is characterized by the  
18 largely isolated and unique sub-heterotic patterns of  
19 the major companies (White et al., 2020) as well as a  
20 high degree of decentralization into smaller, more  
21 or less disconnected sub-programs within those  
22 (Cooper et al., 2014). Plant breeders further have  
23 a tendency for relying on only a small set of elite  
24 inbred lines for producing the next generation of  
25 recombinants (Rasmusson and Phillips, 1997), lead-

ing to a series of significant bottleneck events in the  
history of, for example, the North American maize  
germplasm (White et al., 2020). These characteris-  
tics drastically reduced the effective population size  
within breeding programs and are not predicted to  
be promising strategies under the additive, infinites-  
imal model of quantitative genetics (Gaynor et al.,  
2017). Nevertheless, consistent long-term genetic  
gain has been demonstrated (Duvick et al., 2004).

To better describe and quantify the observed ge-  
netic variation among hybrids, the concept of gen-  
eral and specific combining ability was developed  
early on (Sprague and Tatum, 1942). The former,  
commonly abbreviated as GCA, is a property of  
the additive effects of contributing genes and de-  
scribes the average performance of all hybrids de-  
rived from an inbred. The latter, commonly ab-  
breviated as SCA, is a non-additive residual term  
that describes the deviation of the performance of a  
particular hybrid from the expectation based on the  
parental GCA values.

Running efficient hybrid breeding programs re-  
quires a preponderance of additive genetic variation  
to maximize response to selection in the next gen-  
eration of inbred lines (Falconer and Mackay, 1996)  
as well as the predictability of hybrid performance  
from the GCA of inbred lines (Reif et al., 2007). A  
preponderance of GCA variation also allows identi-  
fication of inbreds that can serve as parents of sev-  
eral high performing hybrids. This greatly simpli-  
fies production of commercial seed, which is a major

\*Plant Breeding, Corteva agriscience, Tavistock, ON, Canada; [frank.technow@corteva.com](mailto:frank.technow@corteva.com)

<sup>†</sup>Systems and Innovation for Breeding and Seed Products, Corteva agriscience, Johnston, IA, USA

<sup>‡</sup>Queensland Alliance for Agriculture and Food Innovation, The University of Queensland, St Lucia, QLD, Australia

57 challenge for many crops (Technow, 2019). There-  
58 fore, hybrid breeding programs have traditionally  
59 relied on maximizing and exploiting GCA variation  
60 (Falconer and Mackay, 1996; Melchinger, 1999).

61 The historically grown paradigms around hy-  
62 brid breeding designs and strategies are now be-  
63 ing challenged by innovative concepts (e.g., Gaynor  
64 et al., 2017; Wallace et al., 2018; Hickey et al., 2019;  
65 Voss-Fels et al., 2019; Seye et al., 2020) devised in  
66 the wake of technological advances such as whole  
67 genome prediction (Meuwissen et al., 2001), high-  
68 throughput phenotyping (Araus and Cairns, 2014)  
69 and genotyping (Poland and Rife, 2012), as well as  
70 gene editing (Jaganathan et al., 2018). While some of  
71 these concepts are highly speculative and might not  
72 live up to expectations (Bernardo, 2016), it is clear  
73 that the next decades will change plant breeding.  
74 However, before implementing drastic changes to  
75 breeding programs we require a theoretical and sim-  
76 ulation framework to explore and understand the  
77 structures and strategies that have contributed to the  
78 success of long term genetic gain and germplasm  
79 improvement. From this historical basis we can eval-  
80 uate novel proposals and draw lessons for design of  
81 future breeding strategies.

82 Empirical reports show a preponderance of addi-  
83 tive variation in many wild, domesticated and lab-  
84 oratory species (Falconer and Mackay, 1996; Lynch  
85 and Walsh, 1998; Hill et al., 2008). This agrees well  
86 with published studies showing a preponderance  
87 of additive GCA over non-additive SCA variation  
88 in hybrid breeding programs (Technow et al., 2014;  
89 Larièpe et al., 2017). At the same time, however,  
90 advances in plant physiology and molecular and  
91 systems biology have stimulated a renewed appre-  
92 ciation of the intricate interactions at the molecu-  
93 lar, metabolic and physiological level that underlie  
94 complex traits (Hammer et al., 2006; Carlborg and  
95 Haley, 2004; Phillips, 2008; Wilkins et al., 2016; Saha  
96 et al., 2011; Jiang et al., 2017). Of particular rele-  
97 vance for hybrid breeding are recent studies indicat-  
98 ing that heterosis is an emergent property of com-  
99 plex metabolic networks (Fiévet et al., 2010, 2018;  
100 Vacher and Small, 2019).

101 The paradox between the complexity of the un-  
102 derlying biology and the simplicity of the expressed  
103 variation can of course be resolved by distinguishing  
104 between biological and statistical effects and realiz-  
105 ing that the former cannot be inferred from the lat-  
106 ter (Wade, 2002; Mackay, 2014; Huang and Mackay,  
107 2016). Statistical effects of genes, as well as their  
108 aggregates such as GCA and SCA and their vari-

ances depend on the genetic background of the pop- 109  
ulation in which they are evaluated, particularly on 110  
allele frequencies and linkage disequilibrium (LD) 111  
patterns (Falconer and Mackay, 1996). For example, 112  
it was shown that, regardless of the underlying ge- 113  
netic architecture, genetic variances in random mat- 114  
ing populations are expected to be predominantly 115  
additive when genes are at extreme frequencies and 116  
linkage disequilibrium is high (Hill et al., 2008). 117

Thus, ratios of additive to non-additive variation 118  
are not intrinsic properties of biological systems but 119  
at least partly a function of allele frequencies and 120  
LD patterns and thus dependent on breeding strate- 121  
gies. Because of the importance of additive varia- 122  
tion for efficient operation of breeding programs, a 123  
framework to evaluate and study breeding strate- 124  
gies should allow for the possibility of additivity 125  
arising from high degrees of biological complexity 126  
at the genetic level. 127

In this study we will use simulations based on the 128  
NK model of genetic complexity (Kauffman, 1993) 129  
to explore two *themes* representing key, historically 130  
grown, characteristics of hybrid breeding: firstly its 131  
decentralization into smaller, more or less independ- 132  
ent sub-programs ("*decentrality* theme") and sec- 133  
ondly the disproportional use of superior inbred 134  
lines for producing the next generation of recom- 135  
binants ("*inbred usage* theme"). Our goal thereby is 136  
not to make specific recommendations for optimal 137  
structuring of programs, but rather to gain an ap- 138  
preciation for the properties of these structures in 139  
the context of different degrees of genetic complex- 140  
ity. 141

## 142 Material and Methods

### 143 Model of genetic complexity

The NK model, introduced by Kauffman (1993) will 144  
form the basis of the simulations. The NK model al- 145  
lows generation of a tunable series of models of trait 146  
genetic architecture with increasing dimensionality 147  
and complexity by varying the number of genes 148  
 $N$  (dimensionality) and the degree of interaction 149  
among them ( $K$ , complexity). 150

The *genetic landscape* metaphor was introduced 151  
and developed by Wright (1932) to aid conceptu- 152  
alizing genetic complexity in high dimensions. As 153  
a metaphor it should not be taken literally but can 154  
help to gain an intuition for the complexity and 155  
ruggedness associated with increasing values of  $K$  156



**Figure 1** Schematic visualization of genetic landscapes corresponding to different values of complexity parameter  $K$ .

157 (Kauffman, 1993) as well as making the rather  
158 abstract concepts discussed henceforth more tangible.  
159 At  $K = 1$  (special case of additive gene action), the  
160 genetic landscape can be imagined as that of Mount  
161 Fuji, i.e., a single, clearly distinguished peak with  
162 a steady and monotonous incline to the top (Figure  
163 1). At intermediate  $K$  levels, the landscape is char-  
164 acterized by multiple peaks clustered together in a  
165 certain region of genetic space. This might be visu-  
166 alized as akin to the European Alps, i.e., a moun-  
167 tainous region within an otherwise flat landscape.  
168 Finally, at high value of  $K$ , the landscape resembles  
169 a sea of dunes, i.e., a range of peaks of similar height  
170 and shape distributed more or less evenly in space.

171 We implemented the  $NK$  model according to  
172 the generalized approach described by Altenberg  
173 (1994), but adapted the model to accommodate  
174 diploid genomes. Here, the complex trait is de-  
175 scribed as a normalized sum of a set of “fitness  
176 components”. The value of each fitness compo-  
177 nent is computed as a function of  $K$  interacting  
178 genes drawn at random from all  $N$  genes. Follow-  
179 ing Altenberg (1994), the specific fitness values were  
180 calculated with *random functions* derived from the  
181 *ran4* pseudo-random number generator (Press et al.,  
182 1992) and are distributed uniformly between 0 and  
183 1. For this study, the number of fitness components  
184 and the number of genes were both set to 500. Genes  
185 were biallelic and the simulated organism diploid.  
186 The complexity parameter  $K$  was varied from 1 to 15  
187 in steps of 1 (i.e. creating genetic landscapes ranging  
188 in complexity from Mount Fuji to The Dunes; Fig-  
189 ure 1). With the exception of  $K = 1$ , this parameter

190 was used as the rate parameter in a Poisson distri-  
191 bution from which the number of interacting genes  
192 was drawn independently for each fitness compo-  
193 nent. The sampled values were then truncated to fall  
194 within a range of 1 and 15. The identities of the in-  
195 teracting genes were drawn at random from the total  
196 set. Thus genes typically influenced multiple fitness  
197 components (i.e., act pleiotropically). For  $K = 1$ ,  
198 each of the 500 genes was assigned to exactly one  
199 fitness component and the values of heterozygous  
200 allele configurations constrained to be midway be-  
201 tween the homozygous configurations. Thus,  $K = 1$   
202 represents the special case of additive gene action.  
203 Using order statistics, the expected value of the max-  
204 imum of two samples from a Uniform distribution  
205 between 0 and 1 is  $2/3$ . Thus, the expected maxi-  
206 mum attainable fitness for the  $K = 1$  special case is  
207  $2/3$ .

208 The complexity of the generated  $NK$  models  
209 was quantified following the “one-mutant neigh-  
210 bour” hill-climbing algorithm described by Kauff-  
211 man (1993), but adapted to diploid organisms. A  
212 randomly generated genotype was used as the start-  
213 ing value. From there, all possible genotypes were  
214 generated that differ from the initial genotype by  
215 one allele at one of the 500 loci. Thus, a homozy-  
216 gous locus was changed to the heterozygous state  
217 while a heterozygous locus was changed to both al-  
218 ternate homozygotes. Then, the fitness values of all  
219 one-allele neighbours were evaluated according to  
220 the defined  $NK$  model and an improved genotype  
221 chosen at random from all fitter one-allele neigh-  
222 bours. This process was repeated until no fitter one-  
223 mutant neighbour could be found, meaning that the  
224 search reached a local or global optimum. For each  
225 level of  $K$ , 100  $NK$  models were generated indepen-  
226 dently and a minimum of 65 searches, each start-  
227 ing at a random initial genotype, were conducted  
228 for each. The statistics recorded were the average  
229 number of steps until a local optimum was reached,  
230 the average Hamming genotypic distance, i.e., the  
231 normalized number of differing genome positions  
232 (Pinheiro et al., 2005), among optima and the corre-  
233 lation between the fitness values of the optima and  
234 the Hamming distance to the highest optimum iden-  
235 tified (Kauffman, 1993).

236 The average Hamming distance between the lo-  
237 cal peaks increased from just below 0.5 at  $K = 2$  to  
238  $2/3$  at around  $K$  of 6 or 7 and remained constant at  
239 this value from there on (Figure 2A). Note that with  
240 three different genotypes at each locus,  $2/3$  is the  
241 expected value of the Hamming distance between



**Figure 2** Relationship between the  $NK$  model complexity parameter  $K$  and (A) the average genetic Hamming distance between local peaks, (B) the average correlation between the fitness values of local peaks and their genetic Hamming distance to the highest peak and (C) the average number of steps to a local peak. Panels (A) and (B) omit results for  $K = 1$ , for which only a single peak exists. The dotted lines in these panels indicate values of  $2/3$  and  $0.0$ , respectively.

242 randomly generated genotypes. Similarly, the corre-  
 243 lation between the fitness values of the local peaks  
 244 and their Hamming distance to the highest identi-  
 245 fied peak increased from  $-0.25$  at  $K = 2$  to zero  
 246 at  $K = 9$  (Figure 2B). Here, a negative correlation  
 247 means that local peaks with higher fitness tend to  
 248 be found near each other and clustered around the  
 249 highest peak. Further, a zero correlation indicates  
 250 that there is no clustering of the peaks and proxim-  
 251 ity to the highest peak. Therefore, local peaks are  
 252 randomly distributed throughout the genetic land-  
 253 scape. Thus, somewhere between  $K = 6$  and  $K = 9$ ,  
 254 the landscape shifts from one in which local peaks  
 255 tend to cluster together, to one where local peaks of  
 256 arbitrary height can exist anywhere in genetic space.  
 257 The average number of steps until a local peak was  
 258 reached decreased with  $K$  from 500 at  $K = 1$  to just  
 259 167 at  $K = 15$  (Figure 2C). Note that 500 is the expec-  
 260 tation at  $K = 1$ , the special case of additive gene ac-  
 261 tion, when starting from randomly generated geno-  
 262 types, because  $1/3$  of the 500 loci are already at  
 263 their highest possible value,  $1/3$  are one step re-  
 264 moved (the heterozygous genotypes) and  $1/3$  are  
 265 two steps removed (the lower homozygotes). Thus,  
 266 the complexity and ruggedness of the genetic land-  
 267 scapes increase further after they become uncorre-  
 268 lated around  $K$  of 6 to 9.

269 The simulated genome comprised 10 diploid  
 270 chromosomes of 1 Morgan length each. Each of  
 271 the chromosomes received a random subset of 50 of  
 272 the 500 genes, which were distributed evenly across  
 273 the chromosome. Recombination was simulated ac-  
 274 cording to the Haldane mapping function with the  
 275 R package “hybred” (Technow, 2013), in the ver-  
 276 sion available from the supplement of Technow and  
 277 Gerke (2017).

## Simulation of hybrid breeding process 278

279 The simulation process is visualized in Figure 3. The  
 280 starting point of the simulation was a base popula-  
 281 tion of inbred lines of size 1,000. This population  
 282 was simulated stochastically as described by Mon-  
 283 tana (2005) to result in an expected LD between two  
 284 loci  $t$  Morgan apart equal to  $r^2 = 0.5 \cdot 2^{-t/0.1}$  and  
 285 with minor allele frequencies distributed uniformly  
 286 between 0.35 and 0.50. The lines from the base pop-  
 287 ulation were then separated at random into two het-  
 288 erotic groups (arbitrarily labelled ‘1’ and ‘2’) and  
 289 further into sub-populations within those. The size  
 290 of those sub-populations depended on the scenario.  
 291 One sub-population from one heterotic group was  
 292 then paired with one sub-population from the other  
 293 group to form sub-heterotic patterns. These popula-  
 294 tion pairs will henceforth be referred to as “breeding  
 295 programs”. Hybrids were produced strictly across  
 296 heterotic groups, by crossing lines from one sub-  
 297 population of a program with lines from the other.  
 298 Breeding crosses, i.e., crosses to generate a new  
 299 generation of recombinant lines were done within  
 300 and among sub-populations, depending on the sce-  
 301 nario but strictly within heterotic groups. The sim-  
 302 ulation of the breeding process described above is  
 303 an approximation of the structure and evolution of  
 304 long term hybrid breeding akin to what we have  
 305 observed in practice; i.e. starting from an initial  
 306 germplasm base, separation into distinct heterotic  
 307 groups and future separation into sub-populations.

308 The GCA of the lines was evaluated with an in-  
 309 complete mating design (Melchinger et al., 1987;  
 310 Seye et al., 2020) by performing 10 crosses per  
 311 line with random partners from the opposite sub-  
 312 population of the same program. The performance  
 313 of the resulting hybrids, as determined according to



**Figure 3** Schematic visualization of simulated hybrid breeding process.

used as a metric of genetic gain. This metric reflects that commercial breeding programs release only a handful of hybrid products each cycle.

Breeding crosses among inbred lines for initiating the next recombination cycle were chosen by assigning each inbred line a usage probability, which was a product between an individual and population level relative contribution value. To determine the former, the lines within each sub-population were ranked according to their observed GCA values. Only the top lines, how many depended on the scenario, were selected as potential parents, the remainder given an individual contribution value of zero. The relative contributions of the selected lines from a given sub-population were drawn from a Dirichlet distribution. The concentration parameters of this distribution were used to modulate the relationship between selection rank and relative contribution. Further details about this will be given later when describing the setting for the “inbred usage theme”.

The population level contribution values describe the overall contribution of lines from one sub-population to the breeding crosses of another. They are thus defined anew for each target population and hence the contribution value of population ‘A’ to the crosses for population ‘B’ might be different than that to the crosses of population ‘C’. The process will be explained using the example visualized in Figure 3. Here there are three programs (labelled ‘A’, ‘B’ and ‘C’, with subscript 1 or 2 indicating the heterotic group).

The programs are ranked from highest to lowest performing according to the average performance of the selected set of experimental hybrids, as described above. Germplasm, in the form of lines used as crossing partners, is exchanged only from higher performing to lower performing programs. Specifically, the amount of crosses with lines from other programs increased from zero for the best performing program (A) to a proportion of  $P_{max}$  for the lowest performing program (C), with intermediate programs staggered equidistantly between. In the example,  $P_{max} = 50\%$ . Thus, program A will perform no crosses with lines from other programs, program B will use lines from other programs in 25% of its new crosses and program C in 50% of its crosses. How much of that overall proportion was derived from each of the other programs was proportional to the relative performance differences. In the example, the difference between program C and A is twice as large as that between C and B, thus, lines from program A were used in twice as many crosses

314 the defined  $NK$  model, was then averaged. Finally, a  
 315 normally distributed noise variable with zero mean  
 316 and variance equal to one third of the variance of  
 317 the GCA values of that sub-population was added  
 318 to those averages to represent experimental and en-  
 319 vironmental noise. The so obtained values were  
 320 used as observed GCA values. Those GCA esti-  
 321 mates were then used to predict the performance  
 322 of all possible inter-group hybrids of that program.  
 323 The top hybrids, how many exactly depended on  
 324 the scenario, were then selected and their true per-  
 325 formance determined according to the  $NK$  model.  
 326 The average of this select group of hybrids, which  
 327 represents a set of advanced experimental hybrids,  
 328 was used to quantify the overall performance of the  
 329 program in the current cycle. The maximum true  
 330 performance of the selected hybrids from all pro-  
 331 grams was defined as the peak performance of the  
 332 whole breeding operation in the current cycle and

385 than lines from program B (33% from A and 17%  
386 from B for at total of 50%). This process thus reflects  
387 that highly successful programs tend to exploit their  
388 own genetics while less successful programs have  
389 more of an incentive to explore superior genetics  
390 from other programs.

391 The relative individual contributions were then  
392 multiplied with the relative population contribu-  
393 tions to arrive at a final relative contribution value  
394 for each line to the crosses of a given popula-  
395 tion. The actual breeding crosses were then deter-  
396 mined by sampling the lines with probabilities  
397 proportional to their contribution values. This was  
398 done with replacement, meaning that the same cross  
399 could have been made multiple times, but excluding  
400 crosses that would result in selfings. One recombi-  
401 nant line was derived from each crossing through  
402 seven generations of single seed descent selfing, fol-  
403 lowed by a final doubled haploid step (Dwivedi  
404 et al., 2015) to result in fully homozygous inbred  
405 lines. This new generation of recombinants fully  
406 replaced the previous generations, i.e., a line was  
407 considered as a crossing partner in only one gener-  
408 ation. The so obtained new recombinants then form  
409 the next breeding cycle. The simulations were con-  
410 ducted for 30 cycles in total and repeated independ-  
411 ently at least 500 times for each scenario studied.  
412 All computations were conducted in the R environ-  
413 ment for statistical computing (R Core Team, 2018).

## 414 Recorded metrics

415 In addition to the already described true perfor-  
416 mance of the best identified hybrid, which was used  
417 as a measure of *peak performance* in a given cycle, sev-  
418 eral other measures were recorded to describe and  
419 understand the dynamics of the system.

420 The *proportion of GCA to total genetic variance*  
421 (%GCA) describes the amount of exploitable addi-  
422 tive genetic variation currently available. It was es-  
423 timated using the hybrids generated for evaluating  
424 the GCA of the inbred lines. For this, the follow-  
425 ing mixed model was fitted:  $h_{ij} = \mu + g_i + g_j + e_{ij}$ ,  
426 where  $h_{ij}$  was the true performance of the hybrids,  
427  $\mu$  the overall mean,  $g_i$  and  $g_j$  were the GCA effects  
428 of the parents from the two heterotic groups and  
429  $e_{ij}$  a residual term. Because the true genetic perfor-  
430 mances of the hybrids were used,  $e_{ij}$  corresponds to  
431 the SCA component. The model was fitted using  
432 the R package “lme4” (Bates et al., 2015) and %GCA  
433 then calculated as  $(V_{g_i} + V_{g_j}) / (V_{g_i} + V_{g_j} + V_{e_{ij}})$ ,

434 where  $V_{g_i}$  etc. were the estimated variance compo-  
435 nents. In scenarios with multiple programs, %GCA  
436 was estimated separately for each and then averaged  
437 to arrive at a single estimate for each cycle.

438 The *modified Rogers’ distances* (Reif et al., 2005)  
439 between the heterotic groups within each program  
440 were used as measures of heterotic group diver-  
441 gence. The distances were calculated for all pro-  
442 grams and averaged to arrive at representative value  
443 for that cycle.

444 To describe the distribution of allele frequencies  
445 within each sub-population and hence the amount  
446 of available allelic diversity we calculated the pro-  
447 portion of loci with a minor allele frequency of less  
448 than 5%. This probability measures the thickness of  
449 the extreme tail of the allele frequency distribution  
450 and thus reflects the degree with which it follows a  
451 ‘U-shape’ (Hill et al., 2008). This metric was evalu-  
452 ated for all sub-populations in each cycle and then  
453 averaged.

454 As a more high-level diversity metric we consid-  
455 ered the *effective population size* ( $N_e$ ) of each sub-  
456 population.  $N_e$  was calculated according to the  
457 method described by Corbin et al. (2012) for estimat-  
458 ing constant effective population size. The so ob-  
459 tained values were averaged across sub-populations.

## 460 Hybrid breeding ‘themes’

461 All previously described parameters, such as pa-  
462 rameters related to the NK model and genetic archi-  
463 tecture, parameters related to testcross evaluation,  
464 etc, were kept constant across the themes investi-  
465 gated.

466 In the *decentrality* theme we explored conse-  
467 quences of separating hybrid breeding programs  
468 into smaller, more or less isolated, units. We defined  
469 three distinct strategies for ‘searching’ (Podlich and  
470 Cooper, 1999) genetic space (Figure 4): a single large  
471 program (*centralized search*) to multiple smaller, fully  
472 isolated programs (*isolated search*). Between these  
473 two extremes we considered a strategy with mul-  
474 tiple smaller programs that exchange germplasm in  
475 the form of breeding crosses (*distributed search*).

476 The centralized search was characterized by a sin-  
477 gle program consisting of one sub-population per  
478 heterotic group. The size of each was 500, for a total  
479 of 1,000 lines generated in each cycle. The number  
480 of lines selected to contribute to the next generation  
481 was 125 per sub-population. The relative individ-  
482 ual contributions of these lines decreased propor-  
483 tionally with their performance ranks. The number



**Figure 4** Schematic visualization of the three general search strategies explored in the *decentrality* theme.

484 of selected experimental hybrids was 125. The isolated  
 485 search strategy comprised five programs, each  
 486 with one sub-population per heterotic group. The  
 487 sub-population size was 100 of which 25 were  
 488 selected. Also here, the relative individual contribu-  
 489 tions of the lines were proportional to their perfor-  
 490 mance ranks. The number of experimental hybrids  
 491 selected per program was 25.



**Figure 5** Distributions of relative individual contributions of selected inbred lines considered in the *inbred usage* theme.

492 In the distributed search we considered three lev-  
 493 els of Pmax: 25%, 50% and 75%. The number of pro-  
 494 grams as well as lines and hybrids created and sel-  
 495 ected for each followed those of the isolated search.  
 496 Note, thus, that the total number of lines and hy-  
 497 brids were the same across all scenarios as was the  
 498 selection intensity.

499 In the *inbred usage* theme we explored the con-  
 500 sequences of different degrees of imbalance in the  
 501 relative contributions of the selected inbred lines

502 to the next generation. The different scenarios ex-  
 503 plored correspond to the distributed search strat-  
 504 egy with Pmax = 50%. Only the relative usage of  
 505 inbred lines was varied. As described above, the  
 506 observed relative contributions were drawn from a  
 507 Dirichlet distribution with concentration parameter  
 508 chosen in a way to result in a certain average re-  
 509 lationship between relative contribution and perfor-  
 510 mance rank. Three scenarios were considered (Fig-  
 511 ure 5). In the *balanced* usage scenario, all selected  
 512 inbreds contributed equally on average, in the *pro-*  
 513 *portional* scenario, the relative contribution declined  
 514 proportional with the performance rank of the lines.  
 515 In the *disproportional* scenario, contributions halved  
 516 with every 5 ranks, meaning that the highest per-  
 517 forming line will contribute twice as much to the  
 518 next generation as the 5th ranked line. The increas-  
 519 ing imbalance in contributions can be quantified as  
 520  $1/b'b$  (with  $b$  being the vector of relative contribu-  
 521 tions), which is an estimate of the effective num-  
 522 ber of contributing lines (Boichard et al., 1997). For  
 523 the balanced scenario, this was 25 and thus equal  
 524 to the actual number of selected lines within each  
 525 sub-population. It decreased to 19.1 and 13.6 for the  
 526 proportional and disproportional scenarios, respec-  
 527 tively.

## Results

### Decentrality theme

528  
 529 Which strategy achieved the highest peak perfor-  
 530 mance depended on the value of the complexity pa-  
 531 rameter  $K$ , with the centralized strategy being su-  
 532 perior at low  $K < 5$ , the distributed strategy at in-  
 533 termediate  $K$  and the isolated strategy at high val-  
 534 ues of  $K$  above eight (Figure 6A). The differences  
 535 between the strategies tended to increase with in-  
 536 creasing  $K$ . The centralized and distributed search  
 537



**Figure 6** Relationship between the  $NK$  model complexity parameter  $K$  (average number of interacting genes) and peak genetic performance in the last cycle for the strategies explored in the decentrality theme: (A) comparing the isolated, distributed and centralized strategies and (B) the different values of  $P_{max}$  within the distributed strategy. The curve of the distributed strategy in (A) is an average across the three  $P_{max}$  scenarios within it.

538 strategies came very close to reaching the theoretical  
 539 maximum peak performance at the special case  
 540 of additivity ( $K = 1$ ), but the isolated strategy re-  
 541 mained considerably below that. Within the dis-  
 542 tributed strategy, the highest  $P_{max}$  value of 75%  
 543 was superior at  $K$  values below eight and the lowest  
 544  $P_{max}$  of 25% at high  $K$  (Figure 6B). The case of  $P_{max}$   
 545 = 50% had peak performance in between the two ex-  
 546 tremes, but more similar to  $P_{max} = 75\%$ . All  $P_{max}$   
 547 scenarios achieved virtually identical peak perfor-  
 548 mance at  $K = 1$ .

549 For brevity, trajectories across cycles are shown  
 550 only for  $K$  values of 1, 6 and 15, representing the  
 551 additive, multi-peaked but clustered and fully un-  
 552 correlated landscapes, respectively (Figure 1). Re-  
 553 sults for all values of  $K$  are available as supplemen-  
 554 tal information (File S1). At  $K = 1$ , the centralized  
 555 search strategy had the highest peak performance in  
 556 all cycles, closely followed by the three versions of  
 557 the distributed search (Figures 8A, B, C). The peak

558 performance of the isolated search strategy was con-  
 559 siderably lower than that of the other strategies as  
 560 it increased at a lower rate and seemed to reach  
 561 a plateau at around cycle 20. At  $K = 6$ , the iso-  
 562 lated search strategy achieved the highest peak per-  
 563 formances in the earlier cycles but was overtaken  
 564 by the distributed search strategies later. Those had  
 565 very similar peak performances until the last few cy-  
 566 cles when the version with  $P_{max}$  of 25% fell behind.  
 567 The centralized search had the lowest peak perfor-  
 568 mances throughout, with the differences to the other  
 569 strategies being particularly large between the inter-  
 570 mediate cycles 15–20. Finally, at  $K = 15$ , only the  
 571 isolated search had a sizable increase in peak per-  
 572 formance cycle over cycle. The distributed search  
 573 strategies showed an increase only in the last few  
 574 cycles and the centralized strategy did not increase  
 575 peak performance at all.

576 As expected %GCA was equal to one for all scenar-  
 577 ios at  $K = 1$  (Figures 8D, E, F). At  $K = 6$ , %GCA  
 578 started at just below 10% and increased from there  
 579 with each cycle. The rate of increase was greatest  
 580 for the isolated strategy which reached almost 100%  
 581 in the final cycles. The centralized search strategy  
 582 had the slowest increase and was still below 50%  
 583 in the final cycle. The distributed search strategies  
 584 were intermediate between these two extremes. The  
 585 increase was steepest for  $P_{max} = 25\%$  case, which  
 586 translated to it having a markedly higher %GCA  
 587 than the  $P_{max} = 50\%$  case and  $P_{max} = 75\%$  case  
 588 during intermediate cycles 15–20. However, all three  
 589 converged to a similar value of around 80% in the fi-  
 590 nal cycle. At  $K = 15$ , %GCA started at zero and only  
 591 the isolated strategy saw a marked increase in early  
 592 cycles. The distributed search strategies saw an in-  
 593 crease in %GCA noticeably above zero only in the  
 594 final cycles and the centralized strategy remained at  
 595 zero throughout.

596 The percent of loci with  $MAF < 0.05$  increased  
 597 over cycles for all strategies and complexity levels  
 598 (Figures 8G, H, I). In all cases, the increase over cy-  
 599 cles was strongest for the isolated search strategy,  
 600 where it reached close to 100% in the final cycles  
 601 and weakest in the centralized search strategy. The  
 602 curves for the three  $P_{max}$  levels of the distributed  
 603 search strategy were similar to each other and inter-  
 604 mediate compared to the two other strategies. The  
 605 differences between the strategies increased with  $K$   
 606 because the increase in the proportion of loci at ex-  
 607 treme frequencies slowed for the distributed and  
 608 centralized strategies with increasing  $K$ . At the  
 609 highest levels of complexity, only between 30% and



**Figure 7** Modified Rogers Distance between heterotic groups as a function  $K$ , averaged across programs, in the connectivity theme. The curve of the distributed strategy represents the average across the three  $P_{max}$  levels.

610 40% of loci showed a  $MAF < 0.05$  in the different  
 611 distributed strategies and less than 20% in the central-  
 612 ized strategy.

613 The modified Rogers Distance between heterotic  
 614 groups increased over cycles for all strategies (Fig-  
 615 ures 8J, K, L). For all levels of complexity, this dis-  
 616 tance was highest for the isolated strategy and low-  
 617 est for the centralized strategy, with the three ver-  
 618 sions of the distributed search having similar values  
 619 that were intermediate to the two extremes (Figure  
 620 7).

621 The  $N_e$  differences among the strategies remained  
 622 largely constant across cycles and levels of  $K$ . For  
 623 the sake of brevity results will only be reported for  
 624 cycle 15 and  $K = 7$ . The estimated  $N_e$  for each-  
 625 sub-population for the isolated search strategy was  
 626 20.0, for the three versions of the distributed search  
 627 it was 23.7 ( $P_{max} = 25\%$ ), 31.3 ( $P_{max} = 50\%$ ) and  
 628 35.4 ( $P_{max} = 75\%$ ), respectively, and for the central-  
 629 ized search strategy 98.3.

### 630 Inbred usage theme

631 For brevity sake, only results for  $K$  of 1, 6 and 15  
 632 are shown (results for all values of  $K$  are provided  
 633 in supplemental file S2). Again, which inbred use-  
 634 age scenario achieved the highest peak performance  
 635 depended on the complexity level  $K$  (Figure 9). At  
 636 the additive case of  $K = 1$ , all strategies achieved  
 637 very similar peak performances close to the theoret-  
 638 ical maximum of  $2/3$ . Until  $K = 8$ , the highest peak  
 639 performances were reached with proportional usage  
 640 of selected inbred lines. For  $K > 8$ , disproportional  
 641 use of inbred lines resulted in the highest peak per-

642 formances. Balanced use generally resulted in the  
 643 lowest peak performance, except for  $K < 4$ , where  
 644 this strategy was slightly ahead of the disproportional  
 645 usage strategy. The differences between the  
 646 strategies tended to increase with  $K$ .

647 The cycle over cycle increase in peak performance  
 648 was initially higher the more disproportional the use  
 649 of the inbreds (Figures 10A, B, C). However, except  
 650 for the highest level of complexity, this did not re-  
 651 sult in the highest maximum performance for this  
 652 scenario, because the increase started to level off in  
 653 the last five to ten cycles. Scenarios with propor-  
 654 tional and balanced use of inbreds therefore had the  
 655 highest peak performance at  $K = 1$ , though the dif-  
 656 ferences were small. At the intermediate level of  
 657  $K = 6$ , the disproportional use scenario was over-  
 658 taken by the proportional use scenario in the last cy-  
 659 cles. The differences between these two were small,  
 660 however. Finally, at  $K = 15$ , only the disproportional  
 661 use scenario achieved a sizable increase in peak per-  
 662 formance.

663 At  $K = 1$ , %GCA stayed constant at one for all  
 664 scenarios, as expected. At  $K = 6$ , %GCA increased  
 665 most strongly for disproportional use, followed by  
 666 proportional and balanced use (Figures 10D, E, F).  
 667 Reaching above 90% for the former, and above 80%  
 668 and 50% for the latter two, respectively. At  $K = 15$ ,  
 669 %GCA remained near zero for the balanced and  
 670 proportional use scenarios throughout. For the dis-  
 671 proportional use scenario, it remained at zero as  
 672 well until cycle ten and increased from there to al-  
 673 most 60%.

674 For all strategies and values of  $K$ , the percent of  
 675 loci with a  $MAF < 0.05$  increased from its initial  
 676 value of zero (Figures 10G, H, I). The increase over  
 677 cycles was strongest for disproportional inbred use,  
 678 for which it reached close to 100% at  $K$  of 1 and  
 679 6. The proportional usage strategy had the sec-  
 680 ond strongest increase and the balanced strategy  
 681 the weakest. As was the case in the decentrality  
 682 theme, the differences between the strategies tended  
 683 to increase with  $K$ . At the highest level of  $K = 15$ ,  
 684 the proportional and balanced strategies stayed be-  
 685 low 40%, whereas the disproportional usage strat-  
 686 egy reached close to 80%.

687 The modified Rogers distance between heterotic  
 688 groups increased over cycles in all scenarios (Figures  
 689 10J, K, L). Throughout it was highest for disproportional  
 690 use, followed by proportional and balanced  
 691 use. Overall, the distance was greatest for the inter-  
 692 mediate complexity level of  $K = 6$ .

693  $N_e$ , again reported only for cycle 15 at  $K = 7$ , was



**Figure 8** Evolution of metrics over cycles in the decentrality theme for scenarios with  $K$  of 1 (left column), 6 (middle) and 15 (right).



**Figure 9** Relationship between the *NK* model complexity parameter *K* and peak genetic performance in the last cycle for the strategies explored in the the inbred usage theme.

694 23.2, 31.3 and 44.6, for the disproportional, propor-  
 695 tional and balanced usage scenarios, respectively.

## 696 Discussion

697 The objective of this study was to explore properties  
 698 of the historically grown structure of commercial  
 699 hybrid breeding programs, particularly in maize,  
 700 and aid the understanding of why these structures  
 701 successfully generated significant amounts of ge-  
 702 netic gain in the past and thereby impact global food  
 703 security. The infinitesimal framework (Barton et al.,  
 704 2017), in which traits are described as the sum of  
 705 a large number of genes all having additive, con-  
 706 text independent effects of similar magnitude, is our  
 707 starting point. However, we seek extensions to ac-  
 708 count for the empirical observations that a) there are  
 709 results observed from operating a long-term breed-  
 710 ing effort that are not consistent with or not easily  
 711 explained within the infinitesimal model framework  
 712 (Rasmusson and Phillips, 1997) and b) reflect the  
 713 reality of a highly complex trait biology (Hammer  
 714 et al., 2006). Therefore, we are motivated to consider  
 715 the influence of complexity of trait genetic architec-  
 716 ture on breeding strategies from the perspective of  
 717 a long-term commercial breeding program (Duvick  
 718 et al., 2004; Cooper et al., 2014).

### 719 Emergence of additivity

720 As a representation of genetic complexity we chose  
 721 the *NK* model framework developed by Kauffman

(1993), which allows exploration of the full contin- 722  
 uum from complete additivity to deep and almost 723  
 intractable genetic complexity. For reference, the 724  
*NK* models used in this study, corresponded to the 725  
 Mount Fuji landscape at  $K = 1$  (Figure 1) and to 726  
 the 'Alps' landscape from  $K = 2$  to  $K$  of 7 or 8. 727  
 After this the genetic models transitioned from the 728  
 multi-peaked but correlated 'Alps' landscape to the 729  
 uncorrelated landscape represented by the 'Dunes' 730  
 metaphor (Figures 1 and 2). 731

In complex genetic landscapes, additive genetic 732  
 variance, the sine qua non of genetic gain, is not a 733  
 constant factor of trait biology (i.e., deducible from 734  
 the molecular properties of genes) but rather emerg- 735  
 ing from the interplay of biology and natural or 736  
 artificial properties of population structure (Wade, 737  
 2002; Cooper et al., 2005). In particular, additiv- 738  
 ity emerges in response to a constraining of the di- 739  
 mensionality of genetic space, or, in other words, 740  
 by limiting genetic diversity. In practice, such con- 741  
 straints in dimensionality are achieved through fixa- 742  
 tion or near fixation of genes (Wade, 2002; Hill et al., 743  
 2008). This process is illustrated in Figure 11 for 744  
 a simple epistatic network consisting of two genes. 745  
 Thus, as genetic complexity increases, the breeder 746  
 needs practical ways to reduce this complexity to a 747  
 manageable level that allows genetic progress. This 748  
 study explored two particular practical approaches 749  
 that have been adopted within commercial hybrid 750  
 breeding, particularly in maize. With the availability 751  
 of genomics and novel thinking about genetic com- 752  
 plexity, we can now study the genetic implications 753  
 of these practical approaches, many of which were 754  
 devised and adopted prior to the availability of a 755  
 theoretical and empirical framework to study their 756  
 effects. 757

Two processes in particular accelerate such con- 758  
 strainment, namely the creation of population bot- 759  
 tlenecks and the subdivision of larger populations 760  
 into more or less independent 'demes' (Katz and 761  
 Young, 1975; Goodnight, 1995). Equivalent pro- 762  
 cesses in the context of plant breeding programs are 763  
 the degree of connectivity between breeding pro- 764  
 grams and the relative use of superior inbred lines 765  
 in breeding crosses for producing the next genera- 766  
 tion, both 'themes' were explored in this study. 767

### 768 Decentrality theme

Classical quantitative genetics infinitesimal theory 769  
 was used to design and optimize commercial hy- 770  
 brid breeding strategies, in combination with em- 771



**Figure 10** Evolution of metrics over cycles in the inbred usage theme for scenarios with  $K$  of 1 (left column), 6 (middle) and 15 (right).



**Figure 11** Illustration of a two-locus epistatic network in which neither the A nor the B locus exhibit any additive variation when all alleles are common (A) but collapses to a perfectly additive system in which the substitution effect of the A locus explains 100% of the variation when the B<sub>2</sub> allele becomes rare (B). Note that the substitution effect of the A locus would be reversed in sign when the B<sub>1</sub> allele became rare instead. Colours green, yellow and red represent high, intermediate and low phenotypic values, respectively.

772 pirical experience of what worked and what did not  
 773 (Hallauer et al., 2010). Yet, even though the infinitesimal  
 774 model implies optimality of a single, homogeneous  
 775 population, there were discussions about the relative  
 776 merits of large centralized vs. decentralized  
 777 breeding programs early on (Baker and Curnow,  
 778 1969). Later on, Podlich and Cooper (1999) explored  
 779 this problem on the basis of Sewall Wright's *shifting*  
 780 *balance theory*, (Wright, 1931, 1977; Wade and Good-  
 781 night, 1998). The shifting balance theory describes  
 782 an evolutionary process in which genetic drift result-  
 783 ing from population subdivision enables random  
 784 movements across genetic space (i.e., against  
 785 selection gradients) and also converts epistatic to  
 786 additive genetic variation through constraining ge-  
 787 netic space as described above. This then en-  
 788 ables local adaptation in complex genetic landscapes  
 789 which is followed by differential migration from  
 790 higher to lower performing sub-populations and  
 791 thus 'spreading' of superior gene complexes across  
 792 the whole *meta population*.

793 While this theory remains controversial as a  
 794 model of natural evolution (Coyne et al., 1997), there  
 795 are remarkable similarities between meta popula-  
 796 tions in the context of the shifting balance theory  
 797 and the population structure of large commercial

breeding operations. The latter also do not oper-  
 798 ate as a centralized unit but rather as a decentral-  
 799 ized network of smaller programs with the most  
 800 successful germplasm being shared across (Cooper  
 801 et al., 2014). The same seems to be the case at the  
 802 industry level, with the major commercial breed-  
 803 ing operations being based on unique and distinct  
 804 germplasm backgrounds, with only occasional ex-  
 805 change of elite material, e.g., through ex-PVP lines  
 806 (Mikel and Dudley, 2006; White et al., 2020). As a  
 807 result of this decentralization, plant breeding pro-  
 808 grams are also characterized by having low effective  
 809 population sizes (Cowling, 2013), which makes  
 810 them more susceptible to genetic drift.

Here, we expanded on the work of Baker and  
 811 Curnow (1969) and Podlich and Cooper (1999) by  
 812 exploring breeding population structures with differ-  
 813 ing degrees of decentrality (Figure 4), ranging  
 814 from a large centralized program with high  $N_e$  to a  
 815 isolated set of smaller programs with low  $N_e$ , with a  
 816 series of scenarios with decentralized but connected  
 817 programs with  $N_e$  values in between these two ex-  
 818 tremes. We indeed found that strategies resulting  
 819 in low within program  $N_e$  through increased decen-  
 820 tralization and isolation became increasingly super-  
 821 ior in terms of peak hybrid performance, as ge-  
 822 netic complexity  $K$  increased, while a centralized  
 823 strategy with high  $N_e$  was superior in less complex  
 824 landscapes. These results thus confirm the find-  
 825 ings of Podlich and Cooper (1999) that a decentral-  
 826 ized search strategy is superior in complex genetic  
 827 landscapes. Increasing isolation and decentraliza-  
 828 tion and the associated  $N_e$  reduction led to quicker  
 829 increases over cycles and higher overall values of  
 830 %GCA (Figure 8). At the highest levels of com-  
 831 plexity, only complete isolation generated amounts  
 832 of GCA variation sufficient for making genetic im-  
 833 provements cycle over cycle. The better ability to ex-  
 834 pose additivity in the form of GCA variation of the  
 835 more isolated and decentralized strategies was ex-  
 836 pected as per the discussion at the beginning of this  
 837 section outlining the relationship between amounts  
 838 of additive variation and constraint of genetic  
 839 space. This explains the clear advantages in terms  
 840 of genetic peak performance of the isolated strategy  
 841 at the highest levels of  $K$ .

The corollary of the constraint of genetic  
 842 space of course is a more rapid decline in genetic di-  
 843 versity and susceptibility to genetic drift, which ul-  
 844 timately limits the selection potential of the programs.  
 845 Indeed, for values of  $K$  below eight, which marked  
 846 the switch from an uncorrelated to multi-peaked but  
 847  
 848  
 849

850 correlated genetic landscape (Figure 2), decentral-  
851 ized programs with increasing rates of germplasm  
852 exchange became superior. Accordingly, having a  
853 large centralized program became the optimal strat-  
854 egy at lower values of  $K$ . Here, the genetic landscape  
855 was simple enough to not require severe constrain-  
856 ment of genetic space to expose sufficient amounts  
857 of GCA variation. The genetic drift experienced by  
858 small, isolated programs then unnecessarily led to  
859 the fixation of unfavourable alleles. This was most  
860 apparent at  $K = 1$  where all variation is additive  
861 by definition and a decentralized strategy is not ex-  
862 pected to have any advantage (Rathie and Nicholas,  
863 1980). Here the isolated strategy led to fixation of  
864 almost all loci from cycle twenty onward and to a  
865 stalling of genetic gain significantly below the theo-  
866 retically achievable maximum (Figure 8).

867 The establishment of genetically divergent het-  
868 erotic groups has always been a central tenant of  
869 hybrid breeding (Melchinger and Gumber, 1998).  
870 Originally, optimal exploitation of heterosis was  
871 the main driver of their establishment (East, 1936).  
872 Later, however, maximization of GCA vs. SCA vari-  
873 ation was identified as an import secondary fea-  
874 ture of heterotic groups (Melchinger and Gumber,  
875 1998). While this is well established for domi-  
876 nant gene action (Reif et al., 2007; Fischer et al.,  
877 2009), there are also indications for the conservation  
878 of favourable epistatic patterns that are disrupted  
879 when lines from different heterotic groups are re-  
880 combined (Bernardo, 2001). Often, heterotic groups  
881 are established from populations that evolved in iso-  
882 lation for a long time. One of the best examples for  
883 this is the Dent by Flint heterotic pattern in maize  
884 which is prevalent in Central Europe and is com-  
885 prised of populations that evolved in separation for  
886 centuries (Rebourg et al., 2003). Heterotic groups are  
887 thus a different and additional form of constrain-  
888 ment of genetic space through historically grown  
889 genetic isolation. In our simulations, the differ-  
890 ent heterotic groups were originated from the same  
891 base population, yet we still observed a significant  
892 degree of genetic differentiation evolve over cycles  
893 (Figure 8), as expected in recurrent, reciprocal selec-  
894 tion regimes (Labate et al., 1999; Longin et al., 2013).  
895 A portion of this differentiation can be attributed to  
896 genetic drift (Gerke et al., 2015), as evidenced by the  
897 non-zero genetic distance at  $K = 1$ , where all ef-  
898 fects are additive and increasing genetic differentia-  
899 tion between heterotic groups would have no effect  
900 on the proportion of GCA variance. However, the  
901 genetic differentiation was considerably higher for

902  $K > 1$  (Figure 7), indicating that there indeed was a  
903 selection advantage to increased heterotic group di-  
904 vergence in complex genetic landscapes. This was  
905 particularly clear for the isolated scenario, where  
906 heterotic patterns could form uninterrupted within  
907 programs. For the centralized and decentralized  
908 strategies, the differentiation was maximal at lower  
909 values of  $K$ , because %GCA, and hence the effec-  
910 tiveness of recurrent, reciprocal selection, declined  
911 afterwards.

## 912 Inbred usage theme

913 The history of North American and European maize  
914 germplasm can be described as a succession of key  
915 inbreds that were heavily used in breeding crosses  
916 and had a distinct and lasting impact on germplasm  
917 (Mikel and Dudley, 2006; Technow et al., 2014; White  
918 et al., 2020). Those inbreds owe their success either  
919 to the outstanding general combining ability rela-  
920 tive to their peers at the time, such as was case for  
921 the important North American line B73 (Mikel and  
922 Dudley, 2006) or their unique adaptation to specific  
923 climatic conditions, such as the European Flint lines  
924  $F2$  and  $F7$  (Messmer et al., 1992; Böhm et al., 2014).  
925 The highly disproportionate importance of success-  
926 ful inbreds led to a significant reduction in ge-  
927 netic diversity (Rasmusson and Phillips, 1997; White  
928 et al., 2020), particularly relative to the source pop-  
929 ulations from which they were derived (Böhm et al.,  
930 2017). However, this constraintment also might be  
931 responsible for the emergence of additive genetic  
932 variation from complex gene action through the so  
933 called founder or bottleneck effect (Goodnight, 1988;  
934 Cheverud and Routman, 1996; Naciri-Graven and  
935 Goudet, 2003; van Heerwaarden et al., 2008). We in-  
936 deed observed that %GCA increased faster over cy-  
937 cles and reached higher values overall the more un-  
938 even the use of selected parents in breeding crosses  
939 (Figure 10), with the exception of  $K = 1$ , where all  
940 variance is additive by definition. At the highest de-  
941 grees of landscape complexity only disproportionate  
942 use of inbreds, resulting in very low  $N_e$ , suc-  
943 ceeded in generating amounts of %GCA sufficient  
944 for genetic improvements. Like in the decentrality  
945 theme, the higher values of %GCA of the dispro-  
946 portional use strategy translated into superior peak  
947 performances only at the values  $K > 8$ , i.e., after the  
948 landscape transitioned from multi-peaked but corre-  
949 lated to uncorrelated. Before that, balanced and par-  
950 ticularly proportional use, both having higher  $N_e$ ,  
951 achieved superior peak performances.

## 952 Maintenance of diversity

953 In our simulations, the constraint of genetic  
954 space and reduction of  $N_e$  through decentralization  
955 and isolation or disproportionate use of inbred lines,  
956 while necessary for exposing additive genetic vari-  
957 ation, led to a rapid fixation of alleles and a slow-  
958 ing of genetic gain in later cycles. This was partly  
959 a consequence of genetic drift caused by the low  
960  $N_e$  (Cowling, 2013). However, the reduction of  $N_e$   
961 was also caused in part by the effects of selection,  
962 particularly once the majority of the genetic vari-  
963 ation was additive. This has not generally hap-  
964 pened in commercial breeding programs, where ge-  
965 netic gain continues apace (Rasmuson and Phillips,  
966 1997; Fischer et al., 2008; Duvick et al., 2004; Pfeif-  
967 er et al., 2019). Several factors that maintain diver-  
968 sity in practical programs were not included in the  
969 simulation model. For example, the simulation im-  
970 plicitly assumed that the environment and manage-  
971 ment conditions remained constant across all cycles,  
972 whereas both change more or less rapidly in real-  
973 ity. Changing selection environments imply chang-  
974 ing selection targets and trajectories (Messina et al.,  
975 2011; Hammer et al., 2009), which reduce the pres-  
976 sure on particular alleles or allele complexes and  
977 thus slow or prevent fixation. Long-term selection  
978 experiments have shown that selection response can  
979 be maintained even in isolated and narrow popu-  
980 lations (Dudley and Lambert, 2010; Durand et al.,  
981 2010, 2015). Several hypotheses were proposed for  
982 these surprising results, including epistasis (Carl-  
983 borg et al., 2006), de novo genetic mutations, partic-  
984 ularly when magnified through effects on epistatic  
985 complexes (Rasmuson and Phillips, 1997; Durand  
986 et al., 2010), creation of heritable epigenetic varia-  
987 tion (Hauben et al., 2009), activity of transposable  
988 elements (Dubin et al., 2018), as well as the presence  
989 of 'cryptic genetic variation' through phenomena  
990 such as canalization (Gibson and Dworkin, 2004).  
991 Of these, only epistasis was present in our simu-  
992 lations. While highly speculative, these biological  
993 phenomena might explain the presence of abun-  
994 dant genetic variation and continued genetic gain in  
995 largely isolated and genetically narrow commercial  
996 plant breeding programs.

## 997 Applications of the $NK$ for plant breeding

998 The  $NK$  model, originally developed by the theoret-  
999 ical biologist Stuart Kauffman to study evolution in  
1000 complex genetic landscapes, has found applications

for modelling complex systems in disparate fields 1001  
such as business administration (Csaszar, 2018), or- 1002  
ganizational learning theory (Lazer and Friedman, 1003  
2007), infrastructure design (Grove and Baumann, 1004  
2012) and physics (Qu et al., 2002). Following the 1005  
example of (Podlich and Cooper, 1999), we here 1006  
used the  $NK$  model to represent genetic complex- 1007  
ity navigated by commercial hybrid breeding oper- 1008  
ations to study the effect of the degree of isolation 1009  
between programs as well as the degree of imbal- 1010  
ance in inbred usage, both key aspects of breeding 1011  
strategies. We propose that this model can serve 1012  
as an ideal starting point to study other aspects of 1013  
hybrid breeding strategies. For example, Cooper 1014  
and Podlich (2002) proposed an extension to the  $NK$  1015  
model that adds an environmental dimension and 1016  
thus allows modelling concepts related to genotype 1017  
by environment interaction (Cooper and DeLacy, 1018  
1994), yield stability (Piepho, 1998; Tollenaar and 1019  
Lee, 2002), product placement (Messina et al., 2018) 1020  
and the target population of environments (Com- 1021  
stock, 1977). These so called  $E(NK)$  models repre- 1022  
sent different environments or management prac- 1023  
tices through a series of more or less similar ge- 1024  
netic landscapes. This of course adds consider- 1025  
able complexity to the already complex static land- 1026  
scapes studied here and poses interesting dilemmas. 1027  
For example, rapidly exposing additive variation, 1028  
e.g., through isolation, might be even more impor- 1029  
tant than in static landscapes because local optima 1030  
have to be exploited quickly before they disappear 1031  
once the environment shifts, for example through 1032  
changes in management such as the historical in- 1033  
creases in plant population for commercial maize 1034  
production (Hammer et al., 2009). However, retain- 1035  
ing allelic diversity, which hampers the exposing of 1036  
additivity, is required to enable renewed adaptation 1037  
to the changed environmental conditions. 1038

A high degree of genetic complexity also implies 1039  
a high degree of context dependency of genetic ef- 1040  
fects. Observe, for example, that the additive sub- 1041  
stitution effect of the 'A' locus in Figure 11 changes 1042  
sign when the  $B_1$  allele instead of the  $B_2$  allele be- 1043  
comes rare. This has consequences on the per- 1044  
sistence of accuracy of estimated QTL effects and 1045  
genomic prediction models and can be addressed 1046  
through iteratively updating training populations 1047  
for genetic model parameterization (Podlich et al., 1048  
2004; Wolc et al., 2016; Forneris et al., 2017). The 1049  
 $NK$  model framework can help address questions 1050  
about the frequency with which this has to hap- 1051  
pen and whether data from previous generations 1052

1053 can be used. Recently, approaches were proposed  
1054 that attempt to capture those context dependencies  
1055 through biological models representing the interde-  
1056 pendencies underlying the traits of interest (Tech-  
1057 now et al., 2015). Such models are only approx-  
1058 imations of the true biological complexity. How-  
1059 ever, Cooper et al. (2005), using the NK framework,  
1060 have shown that even incomplete knowledge of bi-  
1061 ological networks can improve predictability of ge-  
1062 netic effects and genetic gain. The context depen-  
1063 dency of genetic effects, i.e., the effects being nei-  
1064 ther universally positive or negative (Wade, 2002),  
1065 also has implications on innovative proposals for  
1066 using CRISPR-Cas9 gene editing (Jaganathan et al.,  
1067 2018; Gao et al., 2020) to either target recombina-  
1068 tion to create superior hypothetical linkage groups  
1069 (Brandariz and Bernardo, 2019) or even the large  
1070 scale “editing away” of deleterious mutations (Wal-  
1071 lace et al., 2018). Finally, this framework might help  
1072 devise strategies for the efficient introduction of ex-  
1073 otic or ancient germplasm (Yu et al., 2016; Böhm  
1074 et al., 2017), which evolved not just in a very differ-  
1075 ent environmental, but also a different genetic con-  
1076 text from the current elite breeding germplasm.

## 1077 **Back to the future**

1078 The structure of commercial plant breeding pro-  
1079 grams, particularly in major crops like maize, is  
1080 characterized by a large degree of decentralization  
1081 with exchange of successful germplasm within com-  
1082 panies (Cooper et al., 2014), while isolation is the  
1083 norm among companies (Mikel and Dudley, 2006).  
1084 Plant breeders further have a tendency for relying  
1085 on only a small set of elite inbred lines for produc-  
1086 ing the next generation (Rasmusson and Phillips,  
1087 1997), leading to a series of significant bottleneck  
1088 events (White et al., 2020). All of these features  
1089 lead to a drastically reduced effective population  
1090 size and are not predicted to be promising strategies  
1091 under the additive, infinitesimal model of quantita-  
1092 tive genetics. Yet commercial hybrid breeding has  
1093 delivered incredible amounts of genetic gain over  
1094 the last century, and has thus contributed to food  
1095 security and resource conservation (Duvick, 1999).  
1096 Here we postulated that the described structure of  
1097 plant breeding programs, with its constraintment of  
1098 genetic space, is in fact necessary for enabling the  
1099 exploration and exploitation of genetic variation in  
1100 complex genetic landscapes and that the success of  
1101 a breeding program is not only determined by its  
1102 germplasm per se, but by the structures that allow

it to evolve. The breeding program structures de-  
scribed here grew historically and we do not claim  
that it was set up with this intention. However, by  
doing “what worked”, breeders in preceding gener-  
ations might have nonetheless been able to take ad-  
vantage of the process described and postulated in  
this study. Understanding why these historic struc-  
tures “worked” will be critical for designing breed-  
ing programs that can tackle the challenges of the  
century ahead.

## References

- Altenberg, L. (1994). Evolving better representations through se-  
lective genome growth. In *Proceedings of the First Ieee Conference  
on Evolutionary Computation IEEE World Congress on Computa-  
tional Intelligence ICEC-94*, pp. 182–187. IEEE.
- Araus, J. L. and J. E. Cairns (2014). Field high-throughput phe-  
notyping: the new crop breeding frontier. *Trends Plant Sci* 19,  
52–61.
- Baker, L. H. and R. N. Curnow (1969). Choice of Population Size  
and Use of Variation Between Replicate Populations in Plant  
Breeding Selection Programs 1. *Crop Sci* 9, 555–560.
- Barton, N. H., A. M. Etheridge, and A. Véber (2017). The infinitesimal  
model: Definition, derivation, and implications. *Theor Pop  
Biol* 118, 50–73.
- Bates, D., M. Mächler, B. Bolker, and S. Walker (2015). Fitting  
linear mixed-effects models using lme4. *J Stat Soft* 67(1), 1–48.
- Bernardo, R. (2001). breeding potential of intra- and interheterotic  
group crosses in maize. *Crop Sci* 41, 68–71.
- Bernardo, R. (2016). Bandwagons I, too, have known. *Theor Appl  
Genet* 129, 2323–2332.
- Böhm, J., W. Schipprack, V. Mirdita, H. F. Utz, and A. E.  
Melchinger (2014). Breeding potential of european flint maize  
landraces evaluated by their testcross performance. *Crop  
Sci* 54, 1665–1672.
- Böhm, J., W. Schipprack, H. F. Utz, and A. E. Melchinger (2017).  
Tapping the genetic diversity of landraces in allogamous crops  
with doubled haploid lines: a case study from European flint  
maize. *Theor Appl Genet* 130, 861–873.
- Boichard, D., L. Maignel, and É. Verrier (1997). The value of using  
probabilities of gene origin to measure genetic variability in a  
population. *Genet Sel Evol* 29, 5–23.
- Brandariz, S. P. and R. Bernardo (2019). Predicted genetic gains  
from targeted recombination in elite biparental maize popula-  
tions. *Plant Genom* 12, 10.3835/plantgenome2018.08.0062.
- Carlborg, O. and C. S. Haley (2004). Epistasis: too often neglected  
in complex trait studies? *Nat Rev Genet* 5, 618–625.
- Carlborg, O., L. Jacobsson, P. Åhgren, P. Siegel, and L. Andersson  
(2006). Epistasis and the release of genetic variation during  
long-term selection. *Nat Genet* 38, 418–420.

- 1152 Cheverud, J. M. and E. J. Routman (1996). Epistasis as a source of  
1153 increased additive genetic variance at population bottlenecks.  
1154 *Evolution* 50, 1042–1051. 1206
- 1155 Comstock, R. E. (1977). Quantitative genetics and the design of  
1156 breeding programs. In *Proceedings of the International Confer-*  
1157 *ence on Quantitative Genetics*, Ames, IA, pp. 16–21. Iowa State  
1158 University Press. 1209
- 1159 Cooper, M. and I. H. DeLacy (1994). Relationships among  
1160 analytical methods used to study genotypic variation and  
1161 genotype-by-environment interaction in plant breeding multi-  
1162 environment experiments. *Theor Appl Genet* 88, 561–572. 1210
- 1163 Cooper, M., C. D. Messina, D. Podlich, L. R. Totir, A. Baumgarten,  
1164 N. J. Hausmann, D. Wright, and G. Graham (2014). Predicting  
1165 the future of plant breeding: complementing empirical evalu-  
1166 ation with genetic prediction. *Crop Pasture Sci* 65, 311. 1211
- 1167 Cooper, M. and D. W. Podlich (2002). The E(NK) model: Extend-  
1168 ing the NK model to incorporate gene-by-environment inter-  
1169 actions and epistasis for diploid genomes. *Complexity* 7, 31–47. 1212
- 1170 Cooper, M., D. W. Podlich, and O. S. Smith (2005). Gene-to-  
1171 phenotype models and complex trait genetics. *Aust J Agric*  
1172 *Res* 56, 895–918. 1213
- 1173 Corbin, L. J., A. Y. H. Liu, S. C. Bishop, and J. A. Woolliams  
1174 (2012). Estimation of historical effective population size using  
1175 linkage disequilibria with marker data. *J Anim Breed Genet* 129,  
1176 257–270. 1214
- 1177 Cowling, W. A. (2013). Sustainable plant breeding. *Plant*  
1178 *Breed* 132, 1–9. 1215
- 1179 Coyne, J. A., N. H. Barton, and M. Turelli (1997). Perspective:  
1180 a critique of Sewall Wright’s shifting balance theory of evolu-  
1181 tion. *Evolution* 51, 643–671. 1216
- 1182 Csaszar, F. A. (2018). A note on how NK landscapes work. *J Org*  
1183 *Design* 7, 10.1186/s41469-018-0039-0. 1217
- 1184 Dubin, M. J., O. Mittelsten Scheid, and C. Becker (2018). Trans-  
1185 posons: a blessing curse. *Curr Opin Plant Biol* 42, 23–29. 1218
- 1186 Dudley, J. W. and R. J. Lambert (2010). 100 Generations of Selec-  
1187 tion for Oil and Protein in Corn. In *Plant Breeding Reviews*, pp.  
1188 79–110. John Wiley & Sons, Ltd. 1219
- 1189 Durand, E., M. I. Tenaillon, X. Raffoux, S. ThAl’pot, M. Falque,  
1190 P. Jamin, A. Bourgeois, A. Ressayre, and C. Dillmann (2015).  
1191 Dearth of polymorphism associated with a sustained response  
1192 to selection for flowering time in maize. *BMC Evol Biol* 15,  
1193 10.1186/s12862-015-0382-5. 1220
- 1194 Durand, E., M. I. Tenaillon, C. Ridel, D. Coubriche, P. Jamin,  
1195 S. Jouanne, A. Ressayre, A. Charcosset, and C. Dillmann  
1196 (2010). Standing variation and new mutations both contribute  
1197 to a fast response to selection for flowering time in maize in-  
1198 bred. *BMC Evol Biol* 10, 10.1186/1471-2148-10-2. 1221
- 1199 Duvick, D. (1999). Heterosis: feeding people and protecting natu-  
1200 ral resources. In J. Coors and S. Pandey (Eds.), *The genetics and*  
1201 *exploitation of heterosis in crops*, pp. 19–29. Madison, WI: CSSA. 1222
- 1202 Duvick, D., J. Smith, and M. Cooper (2004). Long-term selection  
1203 in a commercial hybrid maize breeding program. In J. Janick  
1204 (Ed.), *Plant Breeding Reviews*, pp. 109–152. Hoboken, NJ: John  
1205 Wiley & Sons, Inc. 1223
- Dwivedi, S. L., A. B. Britt, L. Tripathi, S. Sharma, H. D. Upad-  
hyaya, and R. Ortiz (2015). Haploids: constraints and oppor-  
tunities in plant breeding. *Biotechnol Adv* 33, 812–829. 1206
- East, E. M. (1936). Heterosis. *Genetics* 21, 375–397. 1209
- Falconer, D. S. and T. F. C. Mackay (1996). *Introduction to Quanti-*  
*tative Genetics* (4 ed.). London: Pearson. 1210
- Fievet, J. B., C. Dillmann, and D. de Vienne (2010). Systemic prop-  
erties of metabolic networks lead to an epistasis-based model  
for heterosis. *Theor Appl Genet* 120, 463–473. 1212
- Fievet, J. B., T. Nidelet, C. Dillmann, and D. de Vienne  
(2018). Heterosis is a systemic property emerging from  
non-linear genotype-phenotype relationships: evidence from  
in vitro genetics and computer simulations. *Front Genet* 9,  
10.3389/fgene.2018.00159. 1213
- Fischer, S., J. Mohring, H. P. Maurer, H.-P. Piepho, E.-M. Thiemt,  
C. C. Schon, A. E. Melchinger, and J. C. Reif (2009). Impact  
of genetic divergence on the ratio of variance due to specific  
vs. general combining ability in winter triticale. *Crop Sci* 49,  
2119–2122. 1214
- Fischer, S., J. Mohring, C. C. Schon, H.-P. Piepho, D. Klein,  
W. Schipprack, H. F. Utz, A. E. Melchinger, and J. C. Reif  
(2008). Trends in genetic variance components during 30 years  
of hybrid maize breeding at the University of Hohenheim.  
*Plant Breed* 127, 446–451. 1215
- Forneris, N. S., Z. G. Vitezica, A. Legarra, and M. Perez-Enciso  
(2017). Influence of epistasis on response to genomic se-  
lection using complete sequence data. *Genet Sel Evol* 49,  
10.1186/s12711-017-0340-3. 1216
- Gao, H., M. J. Gadlage, H. R. Lafitte, B. Lenderts, M. Yang,  
M. Schroder, J. Farrell, K. Snopek, D. Peterson, L. Feigenbutz,  
S. Jones, G. S. Clair, M. Rahe, N. Sanyour-Doyel, C. Peng,  
L. Wang, J. K. Young, M. Beatty, B. Dahlke, J. Hazebroek,  
T. W. Greene, A. M. Cigan, N. D. Chilcoat, and R. B. Meeley  
(2020). Superior field performance of waxy corn engineered  
using CRISPR-Cas9. *Nat Biotechnol* 38, 10.1038/s41587-020-  
0444-0. 1217
- Gaynor, R. C., G. Gorjanc, A. R. Bentley, E. S. Ober, P. Howell,  
R. Jackson, I. J. Mackay, and J. M. Hickey (2017). A two-part  
strategy for using genomic selection to develop inbred lines.  
*Crop Sci* 57, 2372–2386. 1218
- Gerke, J. P., J. W. Edwards, K. E. Guill, J. Ross-Ibarra, and M. D.  
McMullen (2015). The genomic impacts of drift and selection  
for hybrid performance in maize. *Genetics* 201, 1201–1211. 1219
- Gibson, G. and I. Dworkin (2004). Uncovering cryptic genetic  
variation. *Nat Rev Genet* 5, 681–690. 1220
- Goodnight, C. J. (1988). Epistasis and the effect of founder events  
on the additive genetic variance. *Evolution* 42, 441–454. 1221
- Goodnight, C. J. (1995). Epistasis and the increase in additive  
genetic variance: implications for phase 1 of Wright’s shifting-  
balance process. *Evolution* 49, 502–511. 1222
- Grove, N. and O. Baumann (2012). Complexity in the telecommu-  
nications industry: When integrating infrastructure and ser-  
vices backfires. *Telecomm Policy* 36, 40–50. 1223

- 1259 Hallauer, A. R., M. J. Carena, and J. B. M. Filho (2010). *Quantitative Genetics in Maize Breeding* (3 ed.). Handbook of Plant  
1260 Breeding. New York: Springer-Verlag. 1312
- 1262 Hammer, G., M. Cooper, F. Tardieu, S. Welch, B. Walsh, F. van  
1263 Eeuwijk, S. Chapman, and D. Podlich (2006). Models for  
1264 navigating biological complexity in breeding improved crop  
1265 plants. *Trends Plant Sci* 11, 587–593. 1317
- 1266 Hammer, G. L., Z. Dong, G. McLean, A. Doherty, C. Messina,  
1267 J. Schussler, C. Zinselmeier, S. Paszkiewicz, and M. Cooper  
1268 (2009). Can changes in canopy and/or root system architecture  
1269 explain historical maize yield trends in the U.S. corn belt? *Crop*  
1270 *Sci* 49, 299–312. 1318
- 1271 Hauben, M., B. Haesendonckx, E. Standaert, K. Van Der Kelen,  
1272 A. Azmi, H. Akpo, F. Van Breusegem, Y. Guisez, M. Bots,  
1273 B. Lambert, B. Laga, and M. De Block (2009). Energy use effi-  
1274 ciency is characterized by an epigenetic component that can  
1275 be directed through artificial selection to increase yield. *Proc*  
1276 *Natl Acad Sci* 106, 20109–20114. 1319
- 1277 Hickey, L. T., A. N. Hafeez, H. Robinson, S. A. Jackson, S. C. M.  
1278 Leal-Bertioli, M. Tester, C. Gao, I. D. Godwin, B. J. Hayes, and  
1279 B. B. H. Wulff (2019). Breeding crops to feed 10 billion. *Nat*  
1280 *Biotechnol* 37, 744–754. 1320
- 1281 Hill, W. G., M. E. Goddard, and P. M. Visscher (2008). Data and  
1282 theory point to mainly additive genetic variance for complex  
1283 traits. *PLoS Genet* 4, e1000008. 1321
- 1284 Huang, W. and T. F. C. Mackay (2016). The genetic architecture of  
1285 quantitative traits cannot be inferred from variance component  
1286 analysis. *PLOS Genet* 12, 10.1371/journal.pgen.1006421. 1322
- 1287 Jaganathan, D., K. Ramasamy, G. Sellamuthu, S. Jayabalan, and  
1288 G. Venkataraman (2018). CRISPR for crop improvement: an  
1289 update review. *Front Plant Sci* 9, 10.3389/fpls.2018.00985. 1323
- 1290 Jiang, Y., R. H. Schmidt, Y. Zhao, and J. C. Reif (2017). A quanti-  
1291 tative genetic framework highlights the role of epistatic effects  
1292 for grain-yield heterosis in bread wheat. *Nature Genet* 49, 1741–  
1293 1746. 1324
- 1294 Katz, A. and S. Young (1975). Selection for high adult body  
1295 weight in *Drosophila* populations with different structures.  
1296 *Genetics* 81, 163–175. 1325
- 1297 Kauffman, S. A. (1993). *The Origins of Order: Self-Organization and*  
1298 *Selection in Evolution*. New York: Oxford University Press. 1326
- 1299 Labate, J., K. R. Lamkey, M. Lee, and W. L. Woodman (1999). Tem-  
1300 poral changes in allele frequencies in two reciprocally selected  
1301 maize populations. *Theor Appl Genet* 99, 1166–1178. 1327
- 1302 Larièpe, A., L. Moreau, J. Laborde, C. Bauland, S. Mez-  
1303 mouk, L. Décousset, T. Mary-Huard, J. B. Fiévet, A. Gallais,  
1304 P. Dubreuil, and A. Charcosset (2017). General and specific  
1305 combining abilities in a maize (*Zea mays* L.) test-cross hybrid  
1306 panel: relative importance of population structure and genetic  
1307 divergence between parents. *Theor Appl Genet* 130, 403–417. 1328
- 1308 Lazer, D. and A. Friedman (2007). The network structure of ex-  
1309 ploration and exploitation. *Adm Sci Q* 52, 667–694. 1329
- 1310 Lippman, Z. B. and D. Zamir (2007). Heterosis: revisiting the  
1311 magic. *Trends Genet* 23, 60–66. 1330
- Longin, C. F. H., M. Gowda, J. Mühleisen, E. Ebmeyer, E. Kazman,  
R. Schachschneider, J. Schacht, M. Kirchhoff, Y. Zhao, and J. C.  
Reif (2013). Hybrid wheat: quantitative genetic parameters  
and consequences for the design of breeding programs. *Theor*  
*Appl Genet* 126, 2791–2801. 1313
- Lynch, M. and B. Walsh (1998). *Genetics and analysis of quantitative*  
*traits*. Sinauer Associates. 1314
- Mackay, T. F. C. (2014). Epistasis and quantitative traits: using  
model organisms to study gene-gene interactions. *Nat Rev*  
*Genet* 15, 22–33. 1315
- Melchinger, A. E. (1999). Genetic diversity and heterosis. In  
J. Coors and S. Pandey (Eds.), *The genetics and exploitation of*  
*heterosis in crops*, pp. 99–118. Madison, WI: ASA, CSSA, and  
SSSA. 1316
- Melchinger, A. E., H. H. Geiger, G. Seitz, and G. A. Schmidt  
(1987). Optimum prediction of three-way crosses from single  
crosses in forage maize (*Zea mays* L.). *Theor Appl Genet* 74,  
339–345. 1317
- Melchinger, A. E. and R. K. Gumber (1998). Overview of hetero-  
sis and heterotic groups in agronomic crops. In *Concepts and*  
*Breeding of Heterosis in Crop Plant*, pp. 29–44. CSSA. 1318
- Messina, C., F. Technow, T. Tang, R. Totir, C. Ghossein, and M. Cooper  
(2018). Leveraging biological insight and environmental vari-  
ation to improve phenotypic prediction: Integrating crop  
growth models (CGM) with whole genome prediction (WGP).  
*Eur J Agron* 100, 151–162. 1319
- Messina, C. D., D. Podlich, Z. Dong, M. Samples, and M. Cooper  
(2011). Yield-trait performance landscapes: from theory to ap-  
plication in breeding maize for drought tolerance. *J Exp Bot* 62,  
855–868. 1320
- Messmer, M. M., A. E. Melchinger, J. Boppenmaier, E. Brunklus-  
Jung, and R. G. Herrmann (1992). Relationships among early  
european maize inbreds: I. genetic diversity among flint and  
dent lines revealed by RFLPs. *Crop Sci* 32, 1301–1309. 1321
- Meuwissen, T. H. E., B. J. Hayes, and M. E. Goddard (2001). Pre-  
diction of total genetic value using genome-wide dense marker  
maps. *Genetics* 157, 1819–1829. 1322
- Mikel, M. A. and J. W. Dudley (2006). Evolution of North Amer-  
ican dent corn from public to proprietary germplasm. *Crop*  
*Sci* 46, 1193–1205. 1323
- Montana, G. (2005). Hapsim: a simulation tool for generating  
haplotype data with pre-specified allele frequencies and ld co-  
efficients. *Bioinformatics* 21, 4309–4311. 1324
- Naciri-Graven, Y. and J. R. M. Goudet (2003). The additive ge-  
netic variance after bottlenecks is affected by the number of  
loci involved in epistatic interactions. *Evolution* 57, 706–716. 1325
- Pfeiffer, B. K., D. Pietsch, R. W. Schnell, and W. L. Rooney (2019).  
Long-term selection in hybrid sorghum breeding programs.  
*Crop Sci* 59, 150–164. 1326
- Phillips, P. C. (2008). Epistasis – the essential role of gene inter-  
actions in the structure and evolution of genetic systems. *Nat*  
*Rev Genet* 9, 855–867. 1327
- Piepho, H. P. (1998). Methods for comparing the yield stability of  
cropping systems. *J Agron Crop Sci* 180, 193–213. 1328

- 1366 Pinheiro, H. P., A. de Souza Pinheiro, and P. K. Sen (2005). Comparison of genomic sequences using the Hamming distance. *J Stat Plan Inference* 130, 325–339. 1418
- 1367 1419
- 1368 1420
- 1369 Podlich, D. and M. Cooper (1999). Modelling plant breeding programs as search strategies on a complex response surface. *Lecture Notes in Computer Science* 1585, 171–178. 1421
- 1370 1422
- 1371 1423
- 1372 Podlich, D. W., C. R. Winkler, and M. Cooper (2004). Mapping as you go. *Crop Sci* 44, 1560–1571. 1424
- 1373 1425
- 1374 Poland, J. A. and T. W. Rife (2012). Genotyping-by-sequencing for plant breeding and genetics. *Plant Genome* 5, 92–102. 1426
- 1375 1427
- 1376 Press, W. H., S. A. Teukolsky, W. T. Vetterling, and B. P. Flannery (1992). *Numerical Recipes in C: The Art of Scientific Computing*. Cambridge: Cambridge University Press. 1428
- 1377 1429
- 1378 1430
- 1379 Qu, X., M. Aldana, and L. P. Kadanoff (2002). Numerical and theoretical studies of noise effects in the Kauffman model. *J Stat Phys* 109, 967–986. 1432
- 1380 1433
- 1381 1434
- 1382 R Core Team (2018). *R: a language and environment for statistical computing*. Vienna, Austria: R Foundation for Statistical Computing. 1435
- 1383 1436
- 1384 1437
- 1385 Rasmusson, D. C. and R. L. Phillips (1997). Plant breeding progress and genetic diversity from de novo variation and elevated epistasis. *Crop Sci* 37, 303–310. 1438
- 1386 1439
- 1387 1440
- 1388 Rathie, K. A. and F. W. Nicholas (1980). Artificial selection with differing population structures. *Genet Res* 36, 117–131. 1441
- 1389 1442
- 1390 Rebourg, C., M. Chastanet, B. Gouesnard, C. Welcker, P. Dubreuil, and A. Charcosset (2003). Maize introduction into Europe: the history reviewed in the light of molecular data. *Theor Appl Genet* 106, 895–903. 1443
- 1391 1444
- 1392 1445
- 1393 1446
- 1394 Reif, J. C., F.-M. Gumpert, S. Fischer, and A. E. Melchinger (2007). Impact of interpopulation divergence on additive and dominance variance in hybrid populations. *Genetics* 176, 1931–1934. 1447
- 1395 1448
- 1396 1449
- 1397 Reif, J. C., A. E. Melchinger, and M. Frisch (2005). Genetical and mathematical properties of similarity and dissimilarity coefficients applied in plant breeding and seed bank management. *Crop Sci* 45, 1–7. 1450
- 1398 1451
- 1399 1452
- 1400 1453
- 1401 Saha, R., P. F. Suthers, and C. D. Maranas (2011). Zea mays iRS1563: a comprehensive genome-scale metabolic reconstruction of maize metabolism. *PLoS ONE* 6, 10.1371/journal.pone.0021784. 1454
- 1402 1455
- 1403 1456
- 1404 1457
- 1405 Seye, A. I., C. Bauland, A. Charcosset, and L. Moreau (2020). Revisiting hybrid breeding designs using genomic predictions: simulations highlight the superiority of incomplete factorials between segregating families over topcross designs. *Theor Appl Genet* 133, 1995–2010. 1458
- 1406 1459
- 1407 1460
- 1408 1461
- 1409 1462
- 1410 Shull, G. H. (1908). The composition of a field of maize. *J Hered os* 4, 296–301. 1463
- 1411 1464
- 1412 Silva Dias, J. C. (2010). Impact of improved vegetable cultivars in overcoming food insecurity. *Euphytica* 176, 125–136. 1465
- 1413 1466
- 1414 Sprague, G. F. and L. A. Tatum (1942). General vs. specific combining ability in single crosses of corn. *Agron J* 34, 923–932. 1467
- 1415 1468
- 1416 1469
- 1417 1470
- Technow, F. (2019). Use of f2 bulks in training sets for genomic prediction of combining ability and hybrid performance. *G3* 9, 1557–1569. 1471
- Technow, F. and J. P. Gerke (2017). Parent-progeny imputation from pooled samples for cost-efficient genotyping in plant breeding. *PLOS ONE* 12, e0190271. 1472
- Technow, F., C. D. Messina, L. R. Totir, and M. Cooper (2015). Integrating crop growth models with whole genome prediction through approximate bayesian computation. *PLOS ONE* 10, e0130855. 1473
- Technow, F., T. A. Schrag, W. Schipprack, E. Bauer, H. Simianer, and A. E. Melchinger (2014). Genome properties and prospects of genomic prediction of hybrid performance in a breeding program of maize. *Genetics* 197, 1343–1355. 1474
- Technow, F., T. A. Schrag, W. Schipprack, and A. E. Melchinger (2014). Identification of key ancestors of modern germplasm in a breeding program of maize. *Theor Appl Genet* 127, 2545–2553. 1475
- Tollenaar, M. and E. A. Lee (2002). Yield potential, yield stability and stress tolerance in maize. *Field Crop Res* 75, 161–169. 1476
- Vacher, M. and I. Small (2019). Simulation of heterosis in a genome-scale metabolic network provides mechanistic explanations for increased biomass production rates in hybrid plants. *Syst Biol Appl* 5(1), 10.1038/s41540-019-0101-8. 1477
- van Heerwaarden, B., Y. Willi, T. N. Kristensen, and A. A. Hoffmann (2008). Population bottlenecks increase additive genetic variance but do not break a selection limit in rain forest drosophila. *Genetics* 179, 2135–2146. 1478
- Voss-Fels, K. P., M. Cooper, and B. J. Hayes (2019). Accelerating crop genetic gains with genomic selection. *Theor Appl Genet* 132, 669–686. 1479
- Wade, M. J. (2002). A gene's eye view of epistasis, selection and speciation. *J Evol Biol* 15, 337–346. 1480
- Wade, M. J. and C. J. Goodnight (1998). The theories of Fisher and Wright in the context of metapopulations: when nature does many small experiments. *Evolution* 52, 1537–1553. 1481
- Wallace, J. G., E. Rodgers-Melnick, and E. S. Buckler (2018). On the road to breeding 4.0: unraveling the good, the bad, and the boring of crop quantitative genomics. *Annu Rev Genet* 52, 421–444. 1482
- White, M. R., M. A. Mikel, N. d. Leon, and S. M. Kaeppler (2020). Diversity and heterotic patterns in North American proprietary dent maize germplasm. *Crop Sci* 60, 100–114. 1483
- Wilkins, O., C. Hafemeister, A. Plessis, M.-M. Holloway-Phillips, G. M. Pham, A. B. Nicotra, G. B. Gregorio, S. K. Jagadish, E. M. Septiningsih, R. Bonneau, and M. Purugganan (2016). EGRINs (environmental gene regulatory influence networks) in rice that function in the response to water deficit, high temperature, and agricultural environments. *Plant Cell* 28, 2365–2384. 1484
- Wolc, A., A. Kranis, J. Arango, P. Settar, J. E. Fulton, N. P. O'Sullivan, A. Avendano, K. A. Watson, J. M. Hickey, G. de los Campos, R. L. Fernando, D. J. Garrick, and J. C. M. Dekkers (2016). Implementation of genomic selection in the poultry industry. *Anim Fron* 6, 23–31. 1485

- 1472 Wright, S. (1931). Evolution in Mendelian populations. *Genet-*  
1473 *ics* 16, 97–159.
- 1474 Wright, S. (1932). The roles of mutation, inbreeding, crossbreed-  
1475 ing, and selection in evolution. In *Proceedings of the Sixth Inter-*  
1476 *national Congress of Genetics*, Ithaca, NY, pp. 356–366. Brooklyn  
1477 Botanic Garden.
- 1478 Wright, S. (1977). *Evolution and the genetics of populations*. Chicago:  
1479 University of Chicago Press.
- 1480 Yu, X., X. Li, T. Guo, C. Zhu, Y. Wu, S. E. Mitchell, K. L. Rooze-  
1481 boom, D. Wang, M. L. Wang, G. A. Pederson, T. T. Tesso,  
1482 P. S. Schnable, R. Bernardo, and J. Yu (2016). Genomic predic-  
1483 tion contributing to a promising global strategy to turbocharge  
1484 gene banks. *Nat Plant* 2, 10.1038/NPLANTS.2016.150.
