# Supplementary material for: Back to the future: Implications of genetic complexity for hybrid breeding strategies
Source: bioRxiv preprint, doi:10.1101/2020.10.21.349332, version 1 (2020-10-22)
Supplement: Supplemental File S2 [file 349332_file03.pdf]

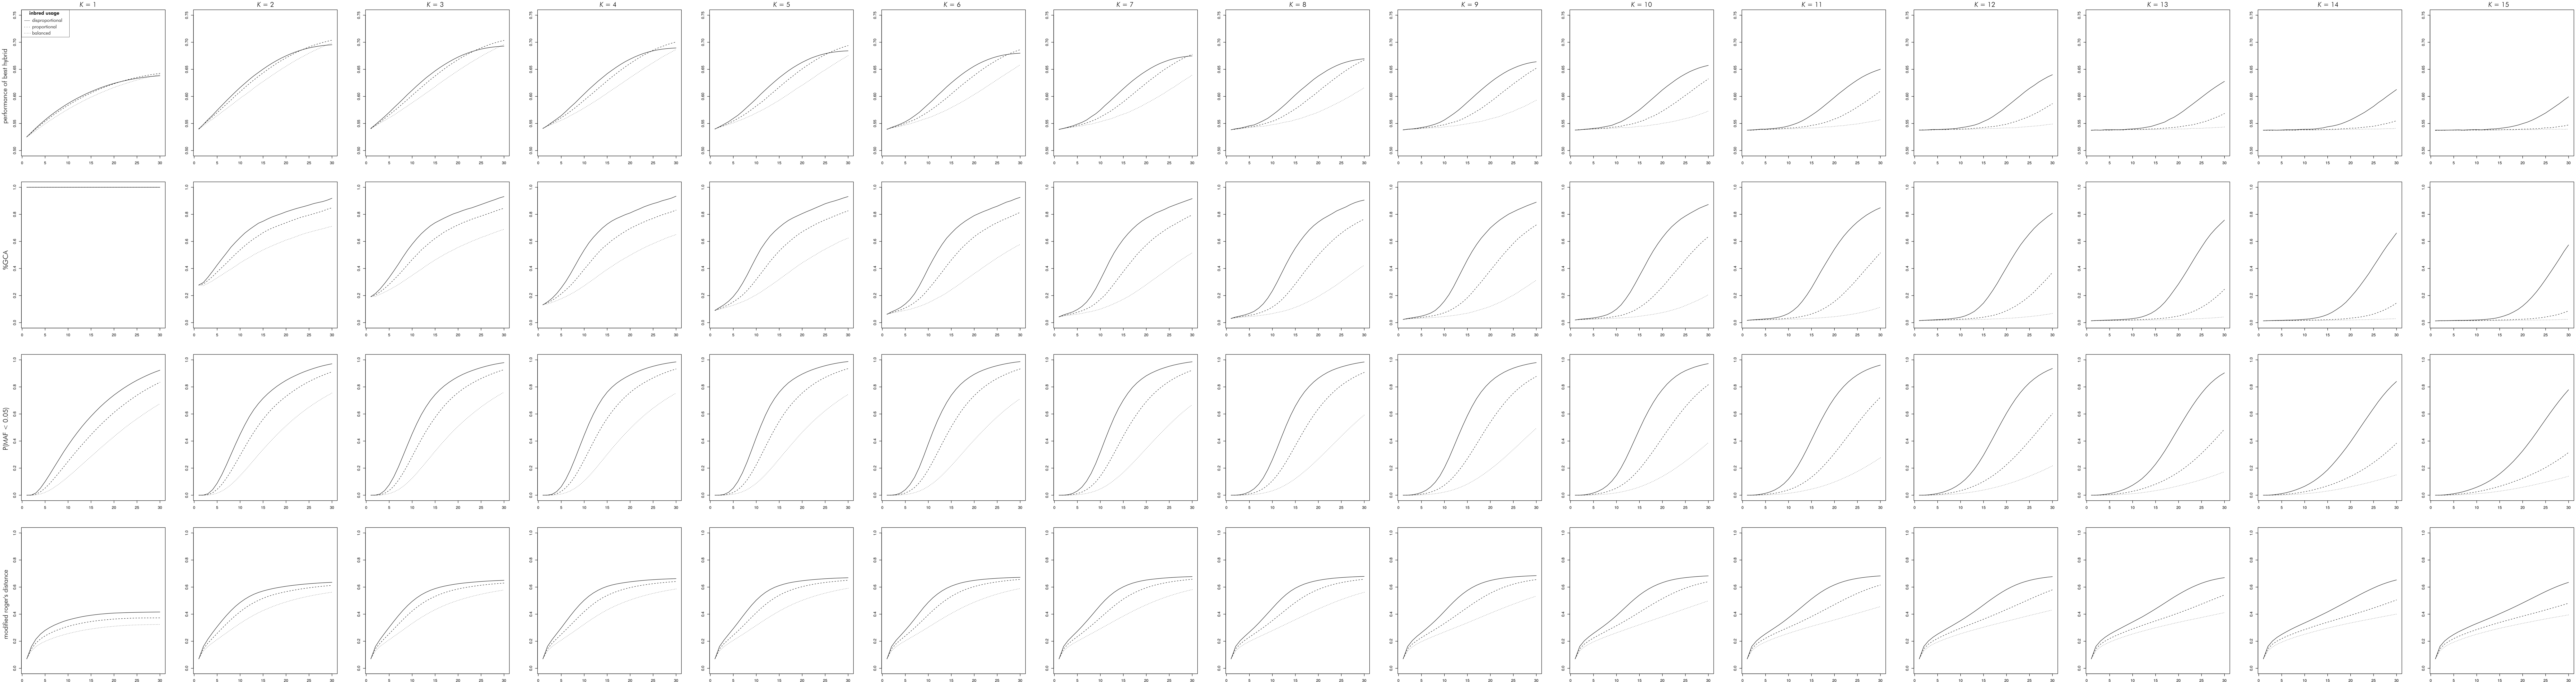

**Figure S2** Evolution of metrics over cycles in the inbred usage theme for all values of complexity parameter  $K$  (columns)
